# Supplementary material for: Nanomechanics of Ultrathin Carbon Nanomembranes
Source: MDPI journal article supplement (doi:10.3390/nano13020267), 2023-01-08
Supplement: s1 [file s1]

## Supporting Information

# Nanomechanics of Ultrathin Carbon Nanomembranes

Marinos Dimitropoulos <sup>1,2</sup>, George Trakakis <sup>1,2</sup>, Nikolaus Meyerbröker <sup>3</sup>, Raphael Gehra <sup>3</sup>, Polina Angelova <sup>3</sup>, Albert Schnieders <sup>3</sup>, Christos Pavlou <sup>1,2</sup>, Christos Kostaras <sup>1,2</sup>, Costas Galiotis <sup>1,2</sup> and Konstantinos Dassios <sup>1,2,\*</sup>

\* Correspondence: kdassios@upatras.gr

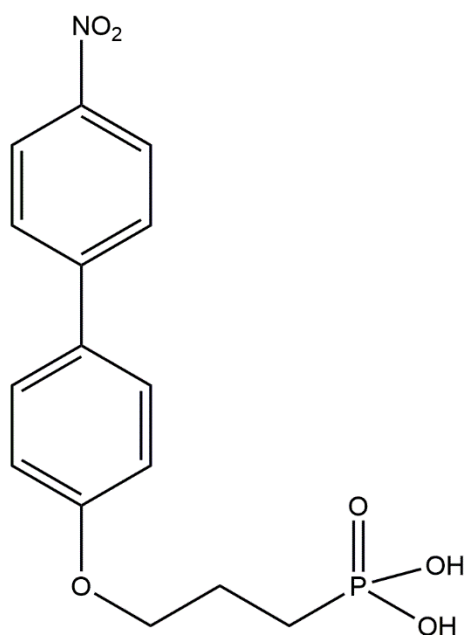

Figure S1: Molecular structure of NBPS.

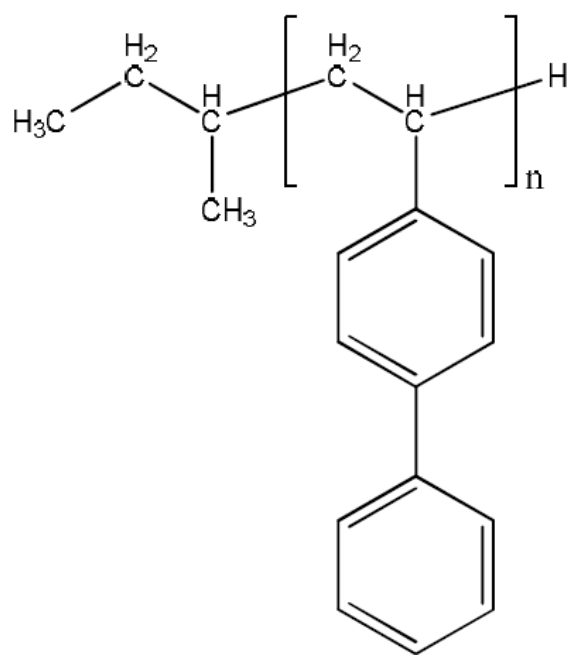

Figure S2: Molecular structure of PVBP.
